# Supplementary material for: Hybrid de novo genome assembly and centromere characterization of the gray mouse lemur (Microcebus murinus)
Source: PubMed Central journal article supplement (PMC5689209; doi:10.1186/s12915-017-0439-6), 2017-11-16
Supplement: 12915_2017_439_MOESM3_ESM.pdf [file 12915_2017_439_MOESM3_ESM.pdf]

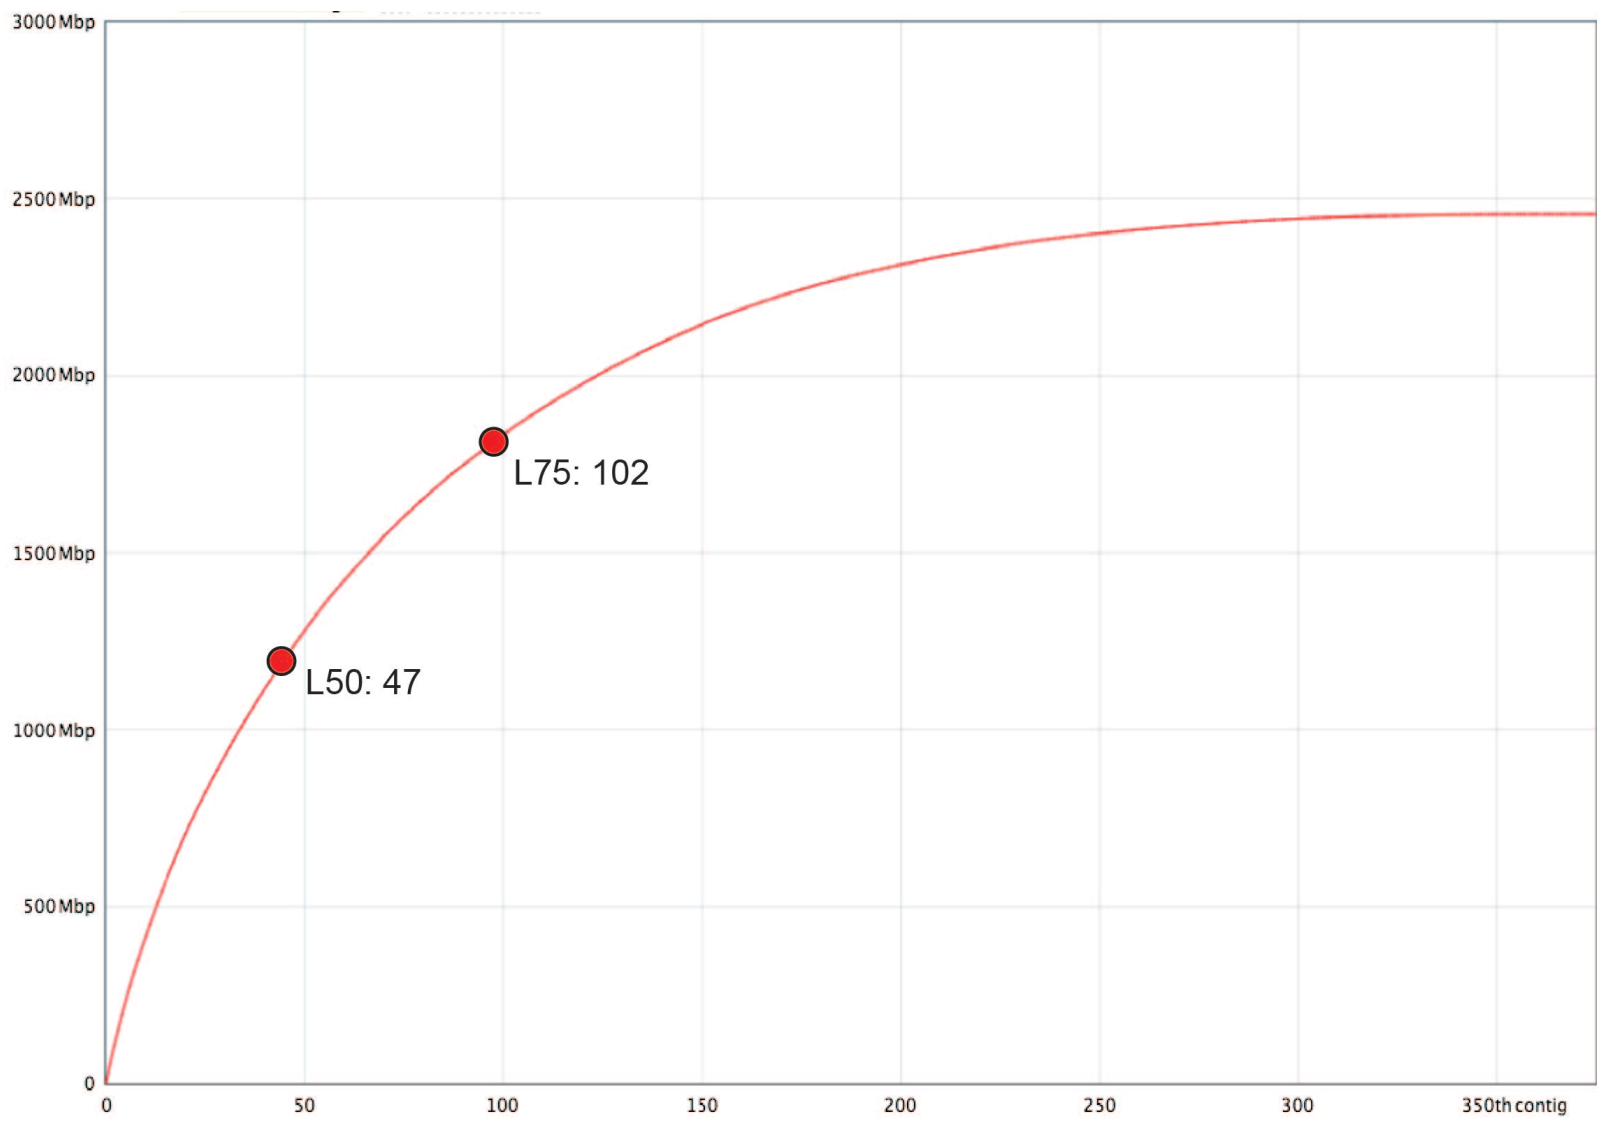

BNG resolved contigs  
(ordered from largest to smallest)
