# Supplementary material for: Hybrid de novo genome assembly and centromere characterization of the gray mouse lemur (Microcebus murinus)
Source: PubMed Central journal article supplement (PMC5689209; doi:10.1186/s12915-017-0439-6), 2017-11-16
Supplement: 12915_2017_439_MOESM5_ESM.pdf [file 12915_2017_439_MOESM5_ESM.pdf]

|                                                                                                                                   |        |        |        |        |        |        |        |        |        |        |        |        |
|-----------------------------------------------------------------------------------------------------------------------------------|--------|--------|--------|--------|--------|--------|--------|--------|--------|--------|--------|--------|
| 4,860                                                                                                                             | 14,870 | 14,880 | 14,890 | 14,900 | 14,910 | 14,920 | 14,930 | 14,940 | 14,950 | 14,960 | 14,970 | 14,980 |
| CCCGTCTGCCGTGGGTGTGTGGACATAGCCAGATCCGCACTGTGCCTTGCCCTGCCCGTCTGCCGTGGGCGAGTGGACACAGCCAGATCCGCACTGCGCCCTTCCTGCCCGTCTCCCGTGGGCGAGTG  |        |        |        |        |        |        |        |        |        |        |        |        |
| 14,990                                                                                                                            | 15,000 | 15,010 | 15,020 | 15,030 | 15,040 | 15,050 | 15,060 | 15,070 | 15,080 | 15,090 | 15,100 | 15,110 |
| GACACAGCCAGATCCGCACTGCGCCCTGCCTGCCCGTCTGCCGTGGGCGAGTGGACACAGCCAGATCCGCACTGCGCCCTGCCTGTCCGTCTGCCGTGGGGGACTGGACACAGCCAGATCCGCACTG   |        |        |        |        |        |        |        |        |        |        |        |        |
| 15,120                                                                                                                            | 15,130 | 15,140 | 15,150 | 15,160 | 15,170 | 15,180 | 15,190 | 15,200 | 15,210 | 15,220 | 15,230 | 15,240 |
| CGCCCTGCCTGCACGTCTCCCGTGGGTTAGTGGACACAGCCAGATCCGCACTGCGCCCTGCCTGCCCGTCTGCCGTGGGTGAGTGGACACAGCCAGATCCGCACTGTGCCCTGCCTGCCCGTCTGCC   |        |        |        |        |        |        |        |        |        |        |        |        |
| 15,250                                                                                                                            | 15,260 | 15,270 | 15,280 | 15,290 | 15,300 | 15,310 | 15,320 | 15,330 | 15,340 | 15,350 | 15,360 |        |
| CTGGGTGAGGGGACACAGCCAGATCCGCACTGCGCCCTGCCTGCCCGTCTCCCGTGGGTGAGTGGACACAGCCAGATCTGCACTGCGCCCTGCCTGCCCGTCTGCCGTGGGTTAGTGGACATAGCCA   |        |        |        |        |        |        |        |        |        |        |        |        |
| 15,370                                                                                                                            | 15,380 | 15,390 | 15,400 | 15,410 | 15,420 | 15,430 | 15,440 | 15,450 | 15,460 | 15,470 | 15,480 | 15,490 |
| TATCCACACAGCACCCCTCTTGCCCGTCTCCCGTGGGTGAGTGGACACAGCCAGATCCGCACTGCGCCCTGCCCTGCCCGTCTGCCGTGGGTGAGTGGACATAGCCAGATCCACACAGCACCCGTCTCT |        |        |        |        |        |        |        |        |        |        |        |        |
| 15,500                                                                                                                            | 15,510 | 15,520 | 15,530 | 15,540 | 15,550 | 15,560 | 15,570 | 15,580 | 15,590 | 15,600 | 15,610 | 15,620 |
| GCCCGTCTCCCGTGGGTGAGTGGACACAGCCAGATCCGCACTGCGCCCTGCCTGCCCGTCTCCCGTGGGTGAGTGGACACAGCCAGATCCGCACTGCGCCCTGCATGCCCATCTCCCGTGGGTGAGT   |        |        |        |        |        |        |        |        |        |        |        |        |
| 15,630                                                                                                                            | 15,640 | 15,650 | 15,660 | 15,670 | 15,680 | 15,690 | 15,700 | 15,710 | 15,720 | 15,730 | 15,740 |        |
| GGACACAGCCAGATCCGCACTGCGCCCTCCCTGCCCGTCTCCCGTGGGTGAGTGGACACAGCCAGATCCGCACTGCGCCCTGCCTGCCCGTCTCCCGTGGGTGAGTGGACACAGCCAGATCCACACT   |        |        |        |        |        |        |        |        |        |        |        |        |
| 15,750                                                                                                                            | 15,760 | 15,770 | 15,780 | 15,790 | 15,800 | 15,810 | 15,820 | 15,830 | 15,840 | 15,850 | 15,860 | 15,870 |
| GCGCCCTGCCTGCCGGTCTCCCGTGGGTGAGTGGACACAGCCAGATCCGCACTGCGCCCTGCCTGCCCGTCTGCCGTGGGCGAGTGGACACAGCCAGATCCGCACTGCGCGCTGCCTGCCCGTCTCC   |        |        |        |        |        |        |        |        |        |        |        |        |
| 15,880                                                                                                                            | 15,890 | 15,900 | 15,910 | 15,920 | 15,930 | 15,940 | 15,950 | 15,960 | 15,970 | 15,980 | 15,990 | 16,000 |
| CGTGGGCGAGTGGACACAGCCAGATCCGCACTGCGCCCTGCCTGCCCGTCTGTCGTGGGCGAGTGGACACAGCCAGATCCGCACTGCACCTGCCTGACCGTCTGCCGTGGGTGAGTGGACACAGCC    |        |        |        |        |        |        |        |        |        |        |        |        |
| 16,010                                                                                                                            | 16,020 | 16,030 | 16,040 | 16,050 | 16,060 | 16,070 | 16,080 | 16,090 | 16,100 | 16,110 | 16,120 |        |
| AGATGACACAGCCAGATCCGCACTGCGCGCTGCCTGCCCGTCTGTCGTGGGCGAGTGGACACAGCCATATCCGCACTGCGCCCTGCCTGCCCGTCTGCCGTGGGTGAGTGGACACAGCCAGATCCAC   |        |        |        |        |        |        |        |        |        |        |        |        |
| 16,130                                                                                                                            | 16,140 | 16,150 | 16,160 | 16,170 | 16,180 | 16,190 | 16,200 | 16,210 | 16,220 | 16,230 | 16,240 | 16,250 |
| ACTGCGCCCTGCCTGCCCGTCTGCCGTGGGTGAGTGGACATAGCCAGATCCACACAGCGCCCTTCTGCCCGTCTCCCGTGGGTGAGTGGACACAGCCAGATCCACACGGCGCCCTGCCTGCCCTTT    |        |        |        |        |        |        |        |        |        |        |        |        |
